# Supplementary material
Source: PubMed Central journal article supplement (PMC4790448)
Supplement: NIHMS764950-supplement-supplemental.pdf [file NIHMS764950-supplement-supplemental.pdf]

## Supplemental Information

### Targeting Human Cancer by a Glycosaminoglycan

#### Binding Malaria Protein

Ali Salanti, Thomas M. Clausen, Mette Ø. Agerbæk, Nader Al Nakouzi, Madeleine Dahlbäck, Htoo Z. Oo, Sherry Lee, Tobias Gustavsson, Jamie R. Rich, Bradley J. Hedberg, Yang Mao, Line Barington, Marina A. Pereira, Janine LoBello, Makoto Endo, Ladan Fazli, Jo Soden, Chris K. Wang, Adam F. Sander, Robert Dagil, Susan Thrane, Peter J. Holst, Le Meng, Francesco Favero, Glen J. Weiss, Morten A. Nielsen, Jim Freeth, Torsten O. Nielsen, Joseph Zaia, Nhan L. Tran, Jeff Trent, John S. Babcook, Thor G. Theander, Poul H. Sorensen, and Mads Daugaard

**SUPPLEMENTAL DATA**

**A**

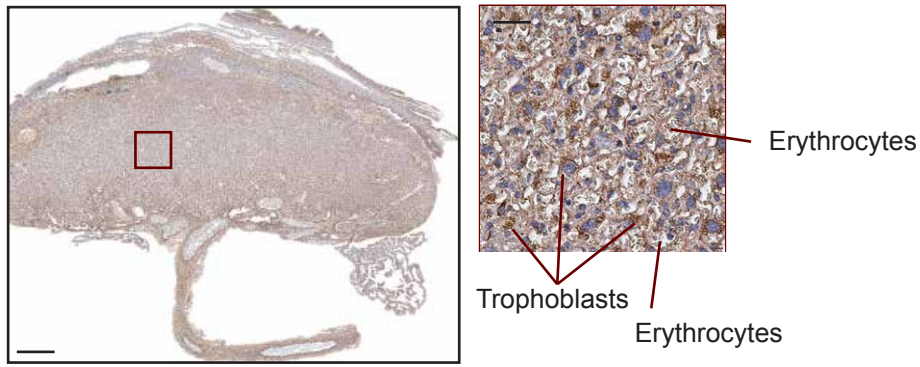

**B**

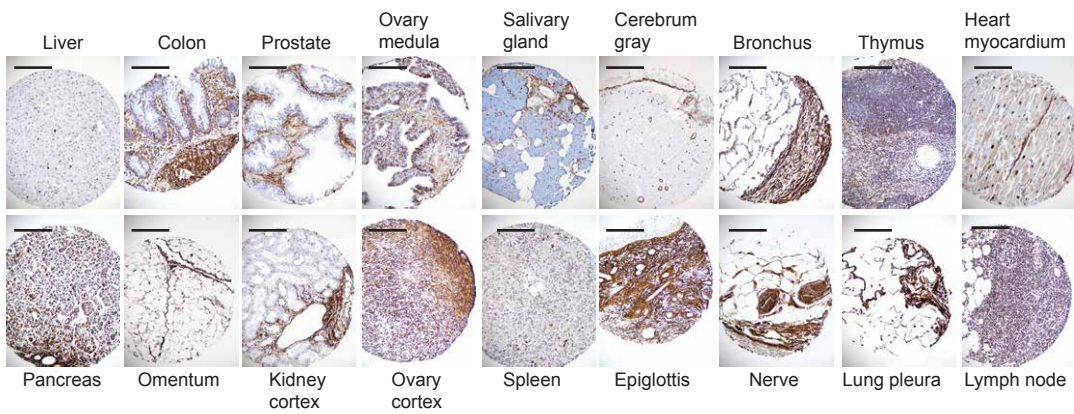

**C**

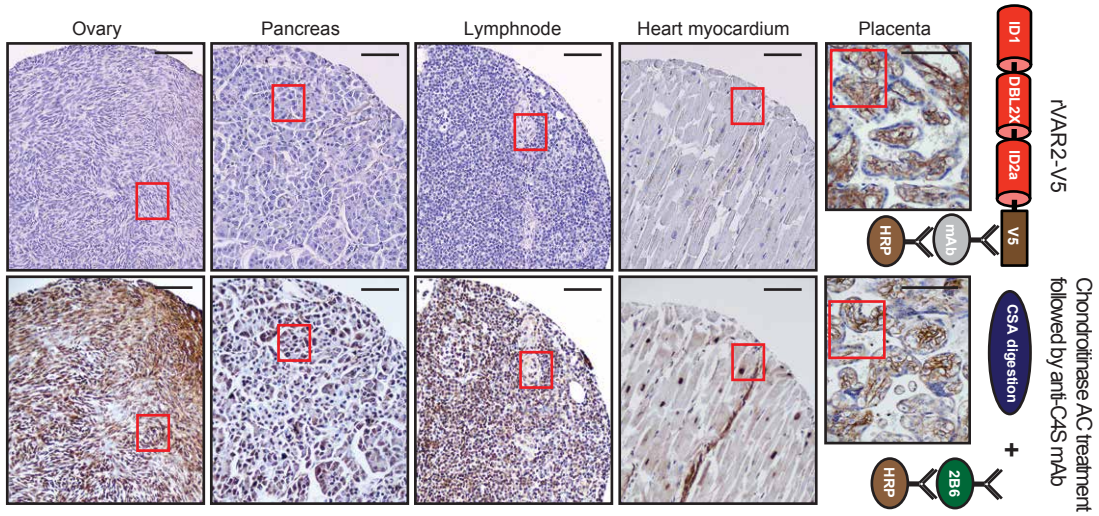

**D**

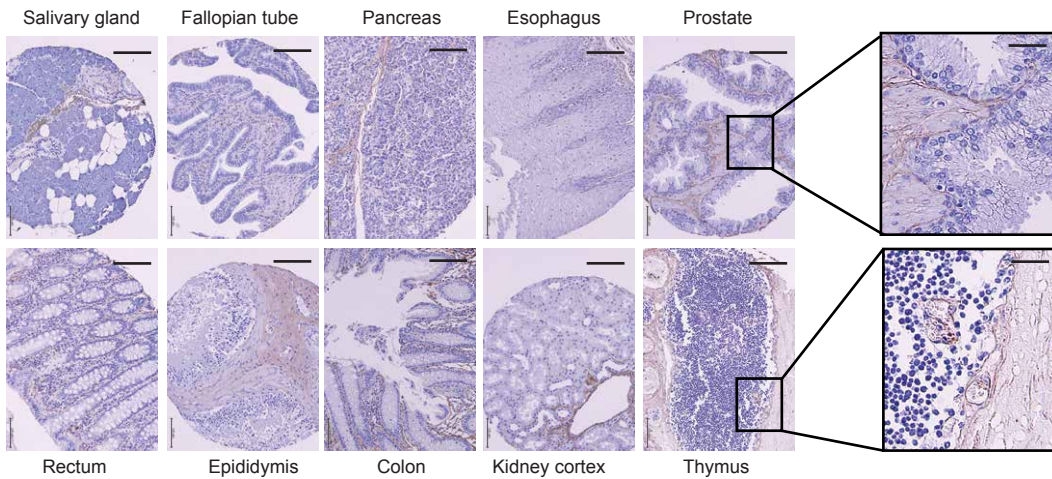

**Figure S1**, related to Figure 1

(A) 4x (left - scale bar 1 mm) and 40x (right - scale bar 150  $\mu\text{m}$ ) magnified images of murine placenta incubated with 500 picomolar rVAR2 and 1:700 anti-V5-HRP. Red box represents magnifications of the indicated area.

(B) Representative 10x (scale bar 300  $\mu\text{m}$ ) magnified images of indicated normal tissue cores incubated with 1 U/ml Chondroitinase AC followed by 1:20 dilution of anti-C4S (2B6) antibody.

(C) Representative images of indicated normal tissue specimens stained with 500 picomolar recombinant VAR2CSA and 1:700 anti-V5-HRP (upper panel) or as describe in **C** (lower panel) (Scale bar 200  $\mu\text{m}$ ). Red boxes represents areas presented in **Figure 1E**.

(D) Representative 10x (Scale bar 250  $\mu\text{m}$ ) magnified images of indicated normal tissue specimens incubated with 500 picomolar rVAR2 and 1:700 anti-V5-HRP. Black boxes represent magnifications of the indicated areas (Scale bar 100  $\mu\text{m}$ ).

**A**

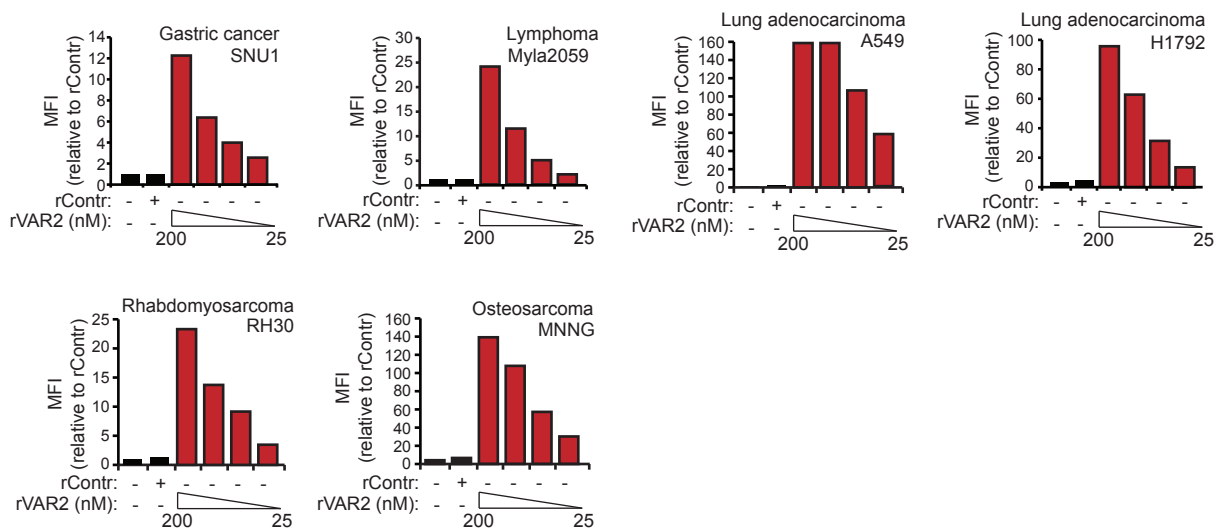

**B**

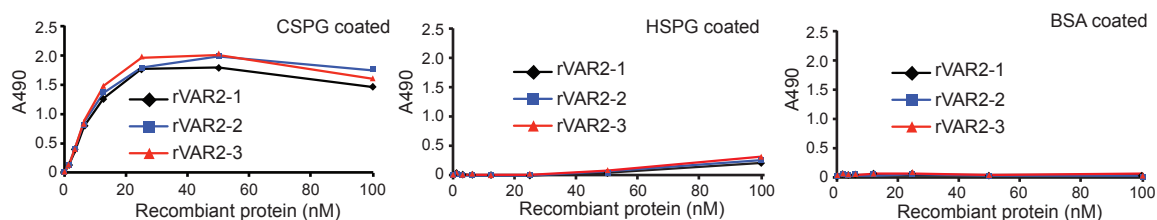

**C**

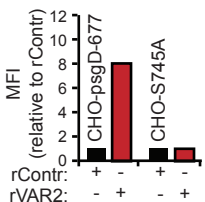

**D**

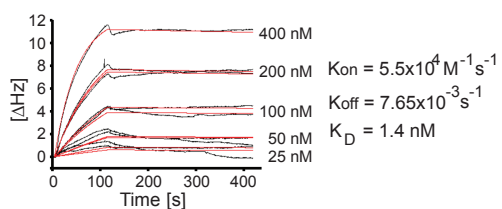

**E**

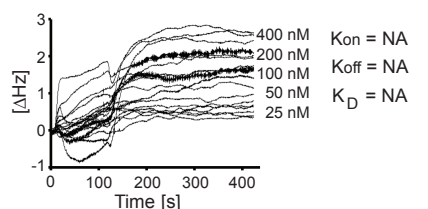

**F**

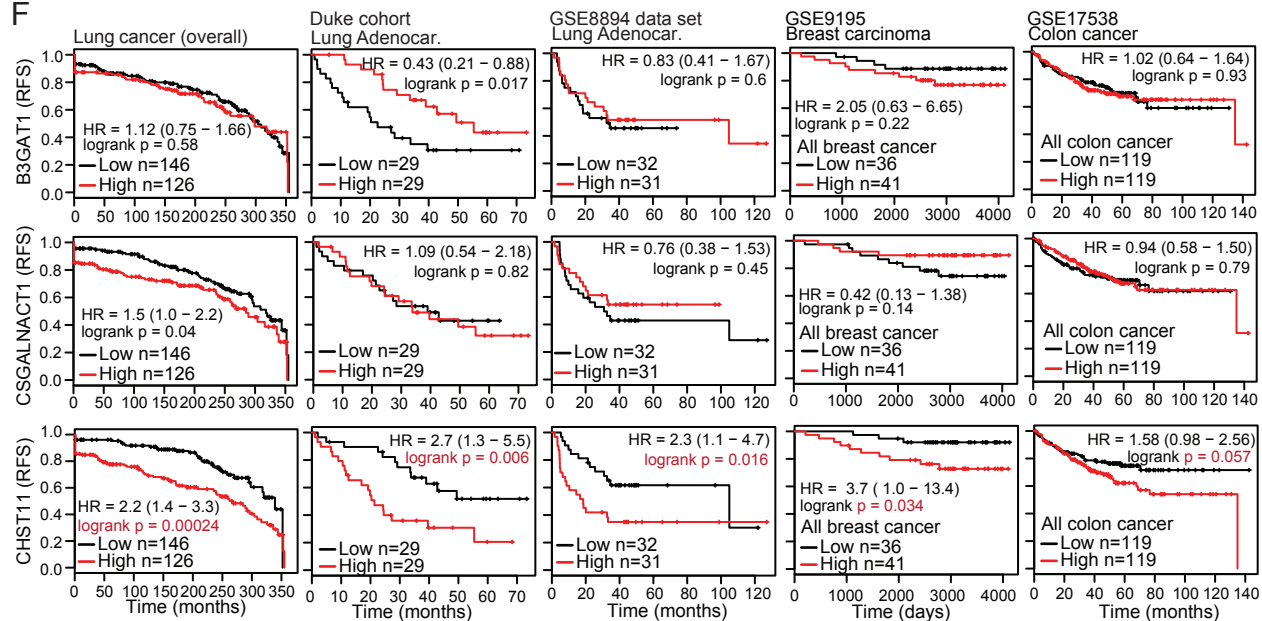

**Figure S2**, related to Figure 2

**(A)** Relative mean fluorescence intensity (MFI) of the denoted cell lines incubated with recombinant control protein (rContr) or VAR2CSA (rVAR2) as indicated and detected by flow cytometry using anti-V5-FITC.

**(B)** Enzyme-linked immunosorbent assay (ELISA) showing concentration dependent rVAR2 binding of three independently synthesized protein batches (rVAR2-1,2,3) to immobilized CSPG (left), HSPG (middle), and BSA (right).

**(C)** Relative mean fluorescence intensity (MFI) of Immortalized CHO-psgD-677 and CHO-S745A cells incubated with recombinant control protein (rContr) or VAR2CSA (rVAR2) as indicated and detected by flow cytometry using anti-V5-FITC.

**(D-E)** Sensorgram showing binding between recombinant VAR2CSA and immobilized CHO-psgD-677 (D) and CHO-S745A (E) cells measured in delta Hertz [ $\Delta$ Hz] as a function of time (in seconds) using the indicated concentrations of recombinant protein. Black lines represent data, and red lines represent fitted curves attained by a 1:1 binding model. Black box summarizes  $K_{on}$ ,  $K_{off}$ , and the calculated  $K_D$  value.

**(F)** Kaplan-Meier plots of the expression of key CS enzymes CHST11, B3GAT1 and CSGALNACT1 linked to overall survival or recurrence free survival (RFS) in indicated datasets of overall lung cancer, the Duke and GSE8894 cohort of lung adenocarcinoma, the GSE9195 breast cancer cohort and the GSE17538 colon cancer cohort. High and low expression was defined as using the median value of the selected gene as separation point. Hazard ratio (HR) was calculated using Cox proportional hazards regression, and p value was calculated using the logrank test.

**Table S1, Related to Figure 2 <sup>1</sup>**

| <b>Cancer of epithelial lineage</b>  |                                     |     |
|--------------------------------------|-------------------------------------|-----|
| A549                                 | Lung adenocarcinoma                 | ++  |
| H1792                                | Lung adenocarcinoma                 | +++ |
| BeWo                                 | Placenta choriocarcinoma            | ++  |
| C32                                  | Melanoma                            | ++  |
| LCC6                                 | Melanoma                            | ++  |
| Colo 205                             | Colorectal adenocarcinoma           | +++ |
| ES-2                                 | Ovarian clear cell carcinoma        | ++  |
| LNCap                                | Prostate adenocarcinoma             | ++  |
| PC-3                                 | Prostate adenocarcinoma             | +++ |
| MDA-MB-231                           | Breast adenocarcinoma               | ++  |
| T47D                                 | Breast ductal carcinoma             | +   |
| SNU-1                                | Gastric carcinoma                   | ++  |
| T24                                  | Bladder transitional cell carcinoma | ++  |
| UM-UC-6                              | Bladder transitional cell carcinoma | +++ |
| <b>Cancer of mesenchymal lineage</b> |                                     |     |
| CW9019                               | Rhabdomyosarcoma                    | +   |
| RH30                                 | Rhabdomyosarcoma                    | ++  |
| MG63                                 | Osteosarcoma                        | ++  |
| MNNG                                 | Osteosarcoma                        | +++ |

|                                        |                                               |     |
|----------------------------------------|-----------------------------------------------|-----|
| U2os                                   | Osteosarcoma                                  | ++  |
| TC32                                   | Ewing sarcoma                                 | +   |
| TC71                                   | Ewing sarcoma                                 | ++  |
| <b>Cancer of hematopoietic lineage</b> |                                               |     |
| FARAGE                                 | Diffuse Large B-cell lymphoma                 | 0   |
| SU-DHL-8                               | Diffuse Large B-cell lymphoma                 | +   |
| KG-1                                   | Acute Myelogenous Leukemia                    | +++ |
| MOLP-2                                 | Multiple Myeloma                              | ++  |
| MyLa 2059                              | Cutaneous T cell lymphoma                     | ++  |
| NALM-6                                 | B cell precursor acute lymphoblastic leukemia | ++  |
| NU-DHL-1                               | B cell lymphoma                               | ++  |

<sup>1</sup> Patient-derived cancer cell lines bound by rVAR2 sorted according to cancer type. 0: no binding; +: low binding; ++: medium binding; +++: high binding. In total, 111 cancer cell lines were tested in flow cytometry of which 106 (95%) cells were positive for VAR2 binding.



**A**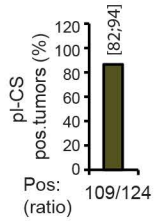**B**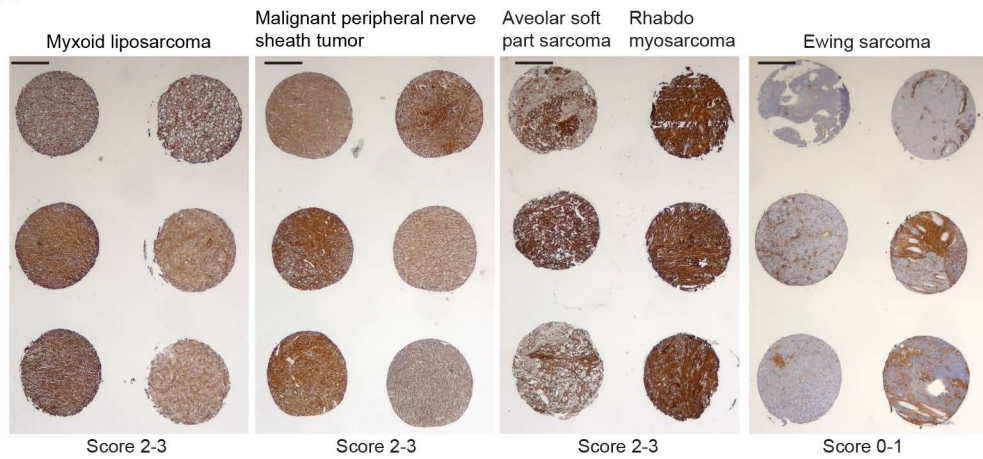**C**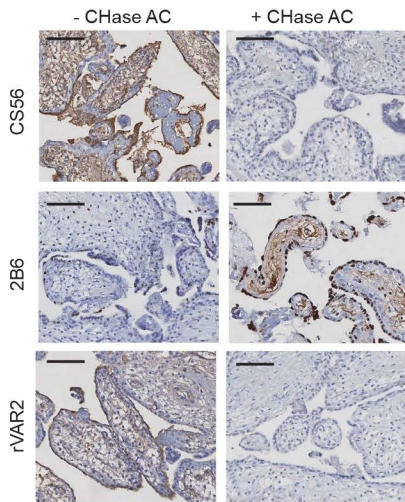**D**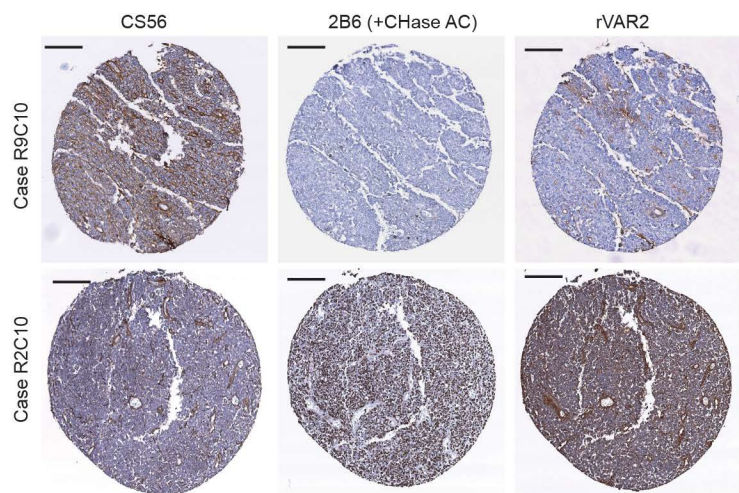**E**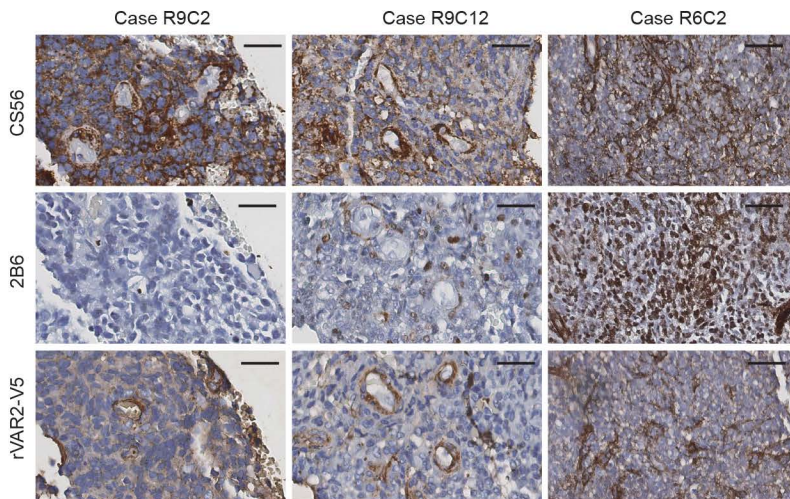**F**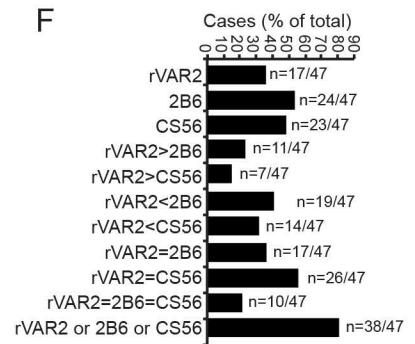**G**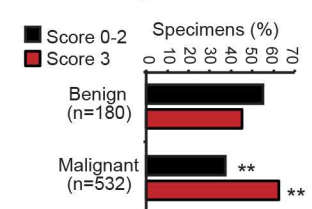**H**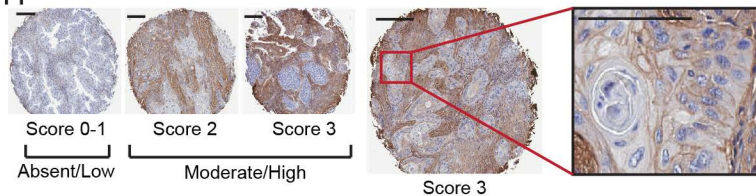**I**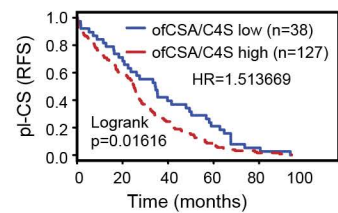



**Figure S3**, related to Figure 3

**(A)** Column graph representation of placental-like CS (pl-CS) staining intensity of mixed breast cancer subtypes (n=124) scored (0-3) for binding to recombinant VAR2CSA. Column shows percentage and exact binomial 95% confidence interval of placental-like CS positive (score 2-3) tumors.

**(B)** Representative 2x (Scale bar 500  $\mu\text{m}$ ) magnified overview images of the soft tissue mesenchymal tumor tissue microarray (Fig. 3G) incubated with recombinant VAR2CSA (rVAR2-V5) and anti-V5-HRP and scored on a 0-3 scale for plasma membrane staining intensity where score 2 equals that of placenta.

**(C)** Representative images of human placenta specimens stained for CS expression with CS56 antibody, 2B6 antibody, and rVAR2 protein (Scale bar 100  $\mu\text{m}$ ). When indicated, specimens were pre-treated with chondroitinase AC to depolymerize the C4S and C6S chains down to 1 single CS unit (stub), which if C4S creates an epitope for the 2B6 antibody while removing binding of the CS56 and rVAR2 (control for binding specificity to CS).

**(D)** Representative images (4x magnification - scale bar 125  $\mu\text{m}$ ) of 2 (out of 47) tissue micro arrayed cases of mixed adulthood and pediatric Ewing's sarcoma treated and stained as in **C**.

**(E)** Three cases of Ewing sarcoma tissue specimens stained with CS56, 2B6 or rVAR2 as in **C** (Scale bar 150  $\mu\text{m}$ ).

**(F)** Ewing's sarcoma TMA (n=47) stained with the 3 reagents (CS56, 2B6, and rVAR2) where analyzed for relative staining intensity as follows **i**) rVAR2 (score 2-3) vs. 2B6 (score 0-1) (rVAR2>2B6); **ii**) rVAR2 (score 2-3) vs. CS56 (score 0-1) (rVAR2>CS56); **iii**) rVAR2 (score 0-1) vs. 2B6 (score 2-3) (rVAR2<2B6); **iv**) rVAR2 (score 0-1) vs. CS56 (score 2-3) (rVAR2<CS56); **v**) rVAR2 and 2B6 same score (rVAR2=2B6); **vi**) rVAR2 and CS56 same score (rVAR2=CS56); rVAR2 and 2B6 and CS56 same score (rVAR2=2B6=CS56); **vii**) at least one of the reagents with a score 2-3 (rVAR2 or 2B6 or CS56).

**(G)** Column graph representation of the distribution in staining intensity between benign vs. malignant soft-tissue lesions. \*\*:p<0.0001.

**(H)** Representative images of a (n=165) non-small cell lung cancer TMA stained with recombinant VAR2CSA (rVAR2). Red box marks the amplified area of a score 3 squamous cell carcinoma. (Scale bar 250  $\mu\text{m}$ ).

**(I)** Kaplan-Meier plot of non-small cell lung tumor TMA stained for placental-like CSA showing recurrence free survival (RFS) of patients with low (score 0-1, n=38) or high (score 2-3, n=127) expressing tumors. Hazard ratio (HR) was calculated using Cox proportional hazards regression, and p value was calculated using the logrank test.

**Table S2**, related to Figure 3

| <b>Melanoma</b>                  | <b>Score 0</b>   | <b>Score 1</b>   | <b>Score 2</b>   | <b>Score 3</b>  |
|----------------------------------|------------------|------------------|------------------|-----------------|
| <b>Benign</b>                    | 14/49<br>(28.6%) | 17/49<br>(34.7%) | 17/49<br>(34.7%) | 1/49<br>(2.0%)  |
| <b>Clark 1</b>                   | 0/7<br>(0.0%)    | 1/7<br>(14.3%)   | 2/7<br>(28.6%)   | 4/7<br>(57.1%)  |
| <b>Clark 2</b>                   | 5/32<br>(15.7%)  | 10/32<br>(31.3%) | 8/32<br>(25.0%)  | 9/32<br>(28.1%) |
| <b>Clark 3</b>                   | 2/24<br>(8.3%)   | 6/24<br>(25.0%)  | 12/24<br>(50.0%) | 4/24<br>(16.7%) |
| <b>Clark 4</b>                   | 3/23<br>(13.0%)  | 6/23<br>(26.1%)  | 8/23<br>(34.8%)  | 6/23<br>(26.1%) |
| <b>Clark 5</b>                   | 0/3<br>(0.0%)    | 1/3<br>(33.3%)   | 0/3<br>(0.0%)    | 2/3<br>(66.7%)  |
| <b>Recurrent/<br/>Metastatic</b> | 3/21<br>(14.3%)  | 1/21<br>(4.8%)   | 8/21<br>(38.1%)  | 9/21<br>(42.9%) |

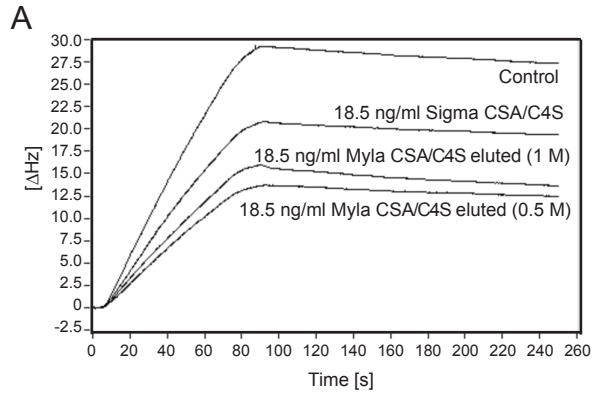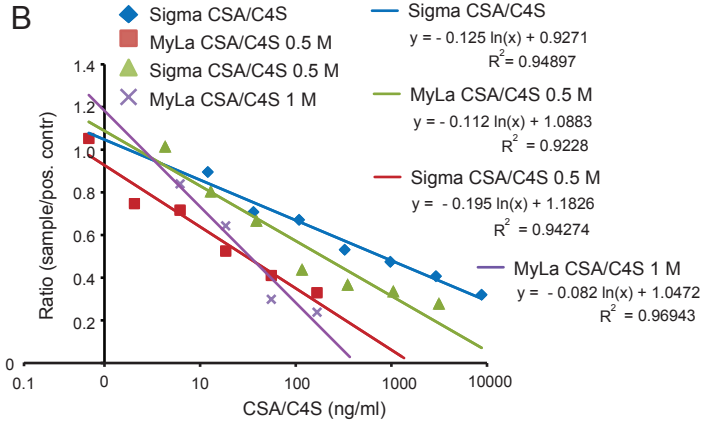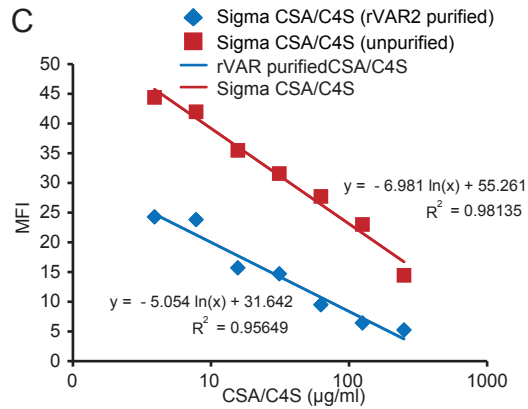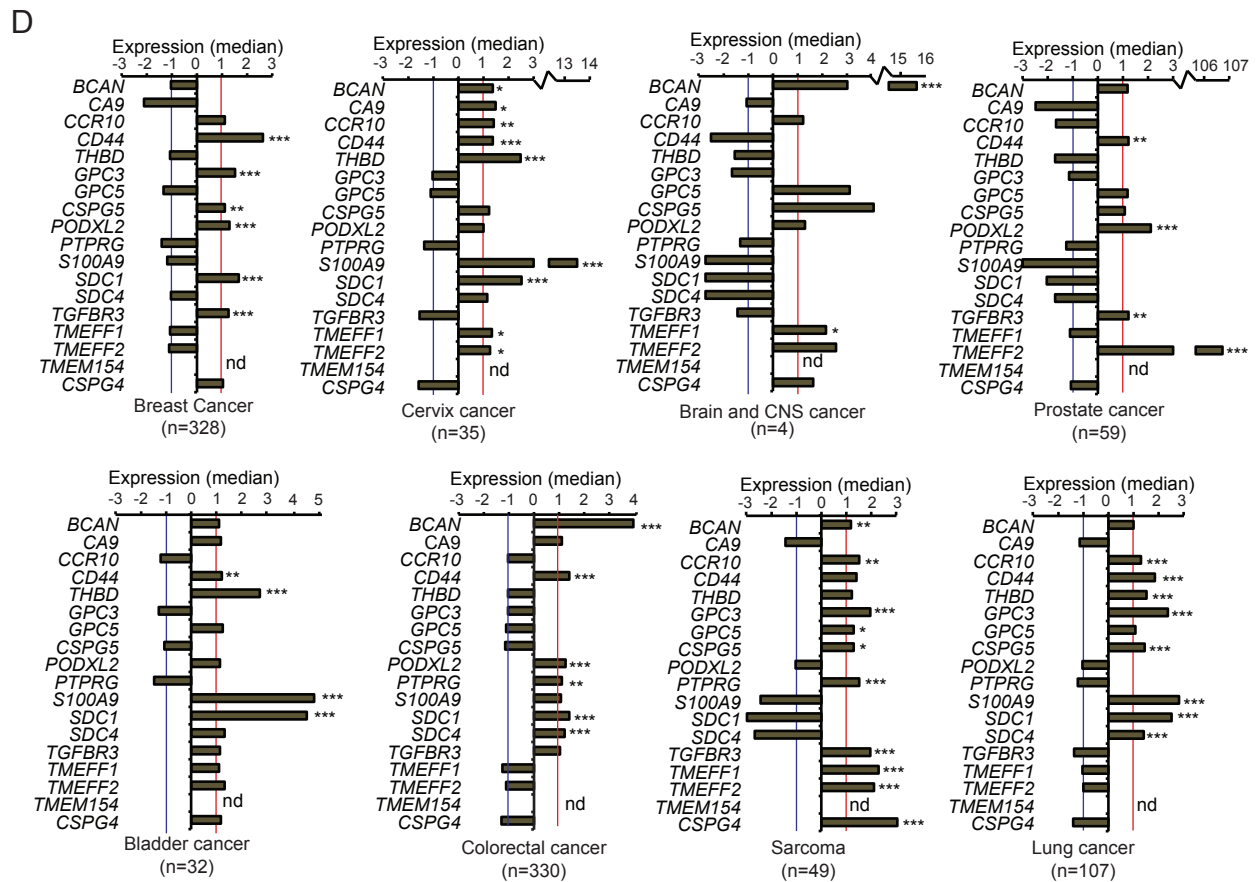

**Figure S4**, related to Figure 4

**(A)** Representative sensorgram from the binding analysis ( $IC_{50}$  values) of high- and low affinity rVAR2-bound CS purified from crude bulk trachea CSA (Sigma) and from MyLa 2059 T-cell Lymphoma cells. Binding of 30 nM rVAR2 pre-incubated with the indicated CS concentrations is measured as delta Hertz [ $\Delta$ Hz] as a function of time (seconds). Inhibitory capacity was assessed as a decrease in peak response levels compared to the positive control.

**(B-C)**  $IC_{50}$  values were calculated from the biosensor **(B)** and FACS **(C)** analysis using linear regression. Concentration of CS is plotted against rVAR2 binding given as a ratio to the nearest positive control (B) or MFI (C). Linear regression was performed in Excel. The equations and corresponding R<sup>2</sup> values are given in the plots, while the resulting  $IC_{50}$  values are shown in table S4.

**(D)** Expression of the indicated genes encoding VAR2CSA plasma membrane binding placental-like CS-modified proteoglycans Figure 4H in the indicated patient specimens extracted from the Oncomine Bitner array and divided into cancer groups. Blue and red lines represent median cut-off for average expression across the entire dataset. \* $p < 0.05$ , \*\* $p < 0.01$ , \*\*\* $p < 0.001$ . nd: not determined (missing probe).



**Table S3**, related to Figure 4 <sup>1</sup>

| Composition   | Myla2059  |                | KG-1      |                |
|---------------|-----------|----------------|-----------|----------------|
|               | Input     | rVAR2 purified | Input     | rVAR2 purified |
| Non-sulfated  | 1.9±1.4%  | 0%             | 2.1±1.5%  | 0%             |
| Mono-sulfated | 98.1±1.4% | 100%           | 98.1±1.4% | 100%           |
| C4S           | 93.9%     | 95.8%          | 95.1%     | 95.5%          |
| C6S           | 6.1%      | 4.2%           | 4.9%      | 4.5%           |
| Di-sulfated   | 0%        | 0%             | 0%        | 0%             |

<sup>1</sup> Compositional analysis of extracted CS species before and after rVAR2 affinity purification. Table shows degree of sulfation as determined by LC-MS and ratio of C4S versus C6S as determined by tandem MS. Selected data is summarized graphically in Fig 5B-E.

**Table S4**, related to Figure 4 <sup>1</sup>

|                                                              | Sigma<br>CSA/C4S | Sigma<br>CSA/C4S  | MyLa2059<br>CSA/C4S | Placenta<br>CSA/C4S |
|--------------------------------------------------------------|------------------|-------------------|---------------------|---------------------|
| <b>Affinity</b>                                              | Input            | rVAR2<br>purified | rVAR2<br>purified   | rVAR2<br>purified   |
| IC <sub>50</sub> µg/ml<br>(Biosensor)                        | 0.79             | 0.19              | 0.033               | 0.063               |
| IC <sub>50</sub> µg/ml<br>(Cancer cell<br>flow<br>cytometry) | 99.6             | 14.7              | n.d.                | n.d.                |
|                                                              |                  |                   |                     |                     |
| <b>Composition</b>                                           |                  |                   |                     |                     |
| Non-sulfated                                                 | 10.5±0.5%        | 1.4±1.1%          | 0%                  |                     |
| Mono-sulfated                                                | 89.5±0.5%        | 98.6±1.1%         | 100%                |                     |
| C4S                                                          | 79.6%            | 90.3%             | 95.8%               |                     |
| C6S                                                          | 20.4%            | 9.7%              | 4.2%                |                     |
| Di-sulfated                                                  | 0%               | 0%                | 0%                  |                     |

<sup>1</sup> Summary of the analysis of the capacity of BT-CSA, before and after rVAR2 affinity purification, and rVAR2 affinity purified Myla2059 CS and placental CS, to inhibit rVAR2 binding to immobilized CSPG in the Attana biosensor and binding to cancer cells in FACS. The composition of the different sources of CS (as in table S2) is listed below. N.d. means that experiment could not be performed due to insufficient amounts of material. Binding inhibition is shown as the concentration needed to block 50% of the binding (IC<sub>50</sub> values) between rVAR2 and the cells measured by biosensor. Data is summarized in Fig 5F-G.

**Table S5**, related to Figure 4<sup>1</sup>.

| <b>Gene symbol</b>  | <b>Protein</b>        | <b>Presence of CSA chain(s)</b>                             | <b>Known function in Cancer</b>                                                                                                                                                                                                                                                            |
|---------------------|-----------------------|-------------------------------------------------------------|--------------------------------------------------------------------------------------------------------------------------------------------------------------------------------------------------------------------------------------------------------------------------------------------|
| <b><i>BCAN</i></b>  | Brevican              | Yes                                                         | Cell adhesion and motility. Isoforms highly expressed on cell surface in glioma (Theocharis et al., 2010)                                                                                                                                                                                  |
| <b><i>CA9</i></b>   | Carbonic anhydrase IX | Proteoglycan but not previously shown to be CSA conjugated. | Involved in cell proliferation and transformation, and solid tumor acidification. Expressed in all clear-cell renal cell carcinoma, but is not detected in normal kidney (Takacova et al., 2013). Also expressed in various other tumours including breast cancers.                        |
| <b><i>CCR10</i></b> | Chemokine receptor 10 | Not known                                                   | Chemokine receptor. Overexpressed in lymphoma, cutaneous squamous cell carcinoma (Kai et al., 2011) and melanoma. Suggested to be involved in metastasis (Murakami et al., 2004).                                                                                                          |
| <b><i>CD44</i></b>  | CD44 molecule         | Yes on splicevariants                                       | Cell adhesion and migration. Associated with a wide range of cancers and cancer stem cells (Naor et al., 1997)                                                                                                                                                                             |
| <b><i>THBD</i></b>  | Thrombomodulin        | Yes                                                         | Binds thrombin. Differently expressed in a wide range of cancers including carcinoma, adenocarcinoma and glioma. Loss of TM expression correlates with certain cancer progressions. Progression of cancer correlates with serum levels of TM and high expression promotes angiogenesis and |

|               |                                               |                                                         |                                                                                                                                                                                                                                                                                                              |
|---------------|-----------------------------------------------|---------------------------------------------------------|--------------------------------------------------------------------------------------------------------------------------------------------------------------------------------------------------------------------------------------------------------------------------------------------------------------|
|               |                                               |                                                         | metastasis (Hanly et al., 2005).                                                                                                                                                                                                                                                                             |
| <b>GPC3</b>   | Glypican 3                                    | HS proteoglycan but not previously shown to present CSA | Binds ECM proteins and growth factors. Has been described as an oncofetal antigen in hepatocellular carcinoma (Iozzo and Sanderson, 2011).                                                                                                                                                                   |
| <b>GPC5</b>   | Glypican 5                                    | Yes                                                     | Binds ECM proteins and growth factors. Overexpressed in several tumors. Has been demonstrated to increase tumour proliferation in rhabdomyosarcomas by potentiating the action of FGF-2, HGF and Wnt1A (Williamson et al., 2007).                                                                            |
| <b>CSPG5</b>  | Neuroglycan                                   | Yes                                                     | ND                                                                                                                                                                                                                                                                                                           |
| <b>PODXL2</b> | Podocalyxin-like 2                            | Yes                                                     | Cell adhesion. Overexpressed in several tumors including breast and prostate cancer, malignant brain tumours, testicular, hepatocellular and renal cell carcinoma. Overexpression has been shown to be an independent predictor of prognosis in breast, renal and colorectal cancers (Larsson et al., 2011). |
| <b>PTPRG</b>  | Protein tyrosin phosphatase, receptor type, G | Proteoglycan with CS acceptor site                      | Enzyme involved in cell growth, differentiation, mitotic cycle, and transformation by oncogenes. Gene methylation and protein activity is associated with tumor suppression (Della Peruta et al., 2010).                                                                                                     |



|                               |                                                                                                 |                                                                                   |                                                                                                                                                                                                                                                                                                                                                                                                        |
|-------------------------------|-------------------------------------------------------------------------------------------------|-----------------------------------------------------------------------------------|--------------------------------------------------------------------------------------------------------------------------------------------------------------------------------------------------------------------------------------------------------------------------------------------------------------------------------------------------------------------------------------------------------|
| <b><i>S100A9</i></b>          | S100 calcium binding protein A9                                                                 | No                                                                                | A calcium- and zinc-binding protein important in the regulation of inflammatory processes and immune response. Upregulated in various cancers including hepatocellular carcinoma (HCC) (Wu et al., 2013).                                                                                                                                                                                              |
| <b><i>SDC1 &amp; SDC4</i></b> | Syndecan 1 & Syndecan 4                                                                         | Yes                                                                               | Regulates cell proliferation, differentiation, adhesion and migration. In particular Syndecan-4 is a focal adhesion component in a range of cell types and mediates breast cancer cell adhesion and spreading. Overexpressed in many cancers including prostate and breast and is key to spread of cancer. Expression correlations with tumor recurrence and poor prognosis (Theocharis et al., 2010). |
| <b><i>TGFBR3</i></b>          | Transforming growth factor, beta receptor III. Also called Betaglycan                           | Yes (Part time)                                                                   | Binds TGF. Plays a role in multiple cancers. Has been shown to decrease cancer cell motility (Mythreya and Blobel, 2009).                                                                                                                                                                                                                                                                              |
| <b><i>TMEFF1/TENB1</i></b>    | Transmembrane protein with EGF-like and two follistatin-like domain 1 also called Tomoregulin-1 | Proteoglycan with unknown modification but has several putative CS acceptor sites | Associated with prostate cancer as well as gastric cancer (Uchida et al., 1999).                                                                                                                                                                                                                                                                                                                       |
| <b><i>TMEFF2/TENB2</i></b>    | Transmembrane protein with EGF-like and two follistatin-like domain 1 Tomoregulin-2             | Yes                                                                               | Diagnostic marker for prostate cancer (Zhao et al., 2008).                                                                                                                                                                                                                                                                                                                                             |
| <b><i>TMEM154</i></b>         | Transmembrane protein 154                                                                       | Not known but has                                                                 | ND                                                                                                                                                                                                                                                                                                                                                                                                     |

|  |  |                                 |  |
|--|--|---------------------------------|--|
|  |  | putative CS<br>acceptor<br>site |  |
|--|--|---------------------------------|--|

<sup>1</sup>VAR2SCA plasma membrane binding-proteins identified by a functional gain-of-binding Retrogenix screen. ND: No data available.

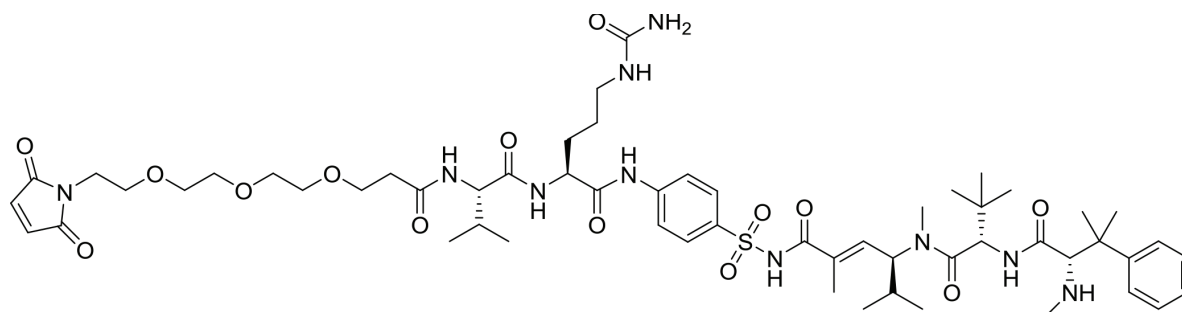

**Figure S5**, related to Figure 7

Structure of the protease cleavable linker-molecule MTvc886 used to conjugate KT886 to rVAR2.

## **SUPPLEMENTAL EXPERIMENTAL PROCEDURES**

### **Cell lines**

Human Cancer cell lines BxPC-3‡, NCI-N87‡, HCC1954‡, HCT-15‡, Capan-2‡, AsPC-1‡, Jurkat‡, MiaPaCa-2‡, OVCAR-3‡, Karpas299†, H1975°, NCI-H358‡, SK-BR-3‡, MCF-7‡, DLD-1‡, NCI-H1437°, HPAF-II‡, Colo205°, MG63°, PC-3‡, T47D‡, MDA-MB-231‡, MDA-MB-468‡, A549‡, 253J B-V°, UM-UC-3‡, K562\*, Rh30°, U2OS°, U138MG‡, A172‡, MNNG/HOS°, JIMT-1°, OE19†, DU145‡, HepG2‡, SKOV-3‡, KG1a‡, H292‡, and HCC1806‡ were obtained from ATCC‡, Sigma-Aldrich†, the University of Copenhagen\*, or the Vancouver Prostate Centre/British Columbia Cancer Agency° and were cultured as instructed by the supplier. The Myla2059 Lymphoma cell lines were graciously donated by Niels Ødum at the University of Copenhagen. FARAGE, SU-DHL-8, KG-1 and NALM-6 were a kind gift from Karen Dybkaer, Aalborg University Hospital, Denmark.

### **Enzyme-linked immunosorbent assay (ELISA)**

Plastic wells were coated with either Chondroitin Sulfate Proteoglycan (CSPG), Heparan Sulfate Proteoglycan (HSPG), or Bovine Serum Albumine (BSA) as indicated and binding of rVAR2 were detected using anti-his HRP antibody.

### **Immunohistochemistry**

Normal tissue and clinico-pathological diagnosed tumor specimens from human patients were obtained from Origen and from tissue microarrays containing a wide variety of mesenchymal tumors (Pacheco and Nielsen, 2012). Lung cancer and melanoma samples



were obtained from patients who underwent total tumor resection. Specimen blocks chosen for the TMA met the criteria of nonnecrotic, nonirradiated, or chemo-treated lung cancer tissue. The TMA contains 231 NSCLC specimens (127 adenocarcinoma and 104 squamous cell carcinoma) and 159 mixed staged melanoma specimens. Samples were double punched 0.6 um diameter using an indexed manual arrayer with an attached stereomicroscope under the direction of a certified pathologist, who also reviewed and verified the tumor content. Test for association of CSA (low or high) with RFS in the lung TMA was performed using a one-tail Mann-Whitney test, and CSA scores with melanoma progression was performed using Goodman-Kruskal-Gamma test.  $p < 0.05$  was considered significant. Using the Ventana Discovery platform, sectioned paraffin-embedded tissue samples were stained with 500 picomolar V5-tagged rVAR2 without antigen retrieval followed by 1:700 monoclonal anti-V5 step, and a anti-mouse-HRP detection step. Mounted and stained specimens were subsequently scored for membranous staining intensity on a 0-3 scale. Score 0-1 represented absent/weak staining and score 2-3 positive staining, where score 2 reflects a staining intensity equal to that of placenta (included as a positive control in each staining run). Within each cancer group the percentage and exact binomial 95% confidence interval was calculated using STATA 12 software.

### **Retrogenix Technology**

Screening for VAR2CSA binding proteins was performed using the Retrogenix Cell Microarray technology ([www.retrogenix.com](http://www.retrogenix.com)). Initially 3550 expression vectors, each encoding a unique human plasma membrane protein and the fluorescent ZsGreen1 protein, were pre-spotted on glass slides. Human HEK293 cells were grown over the arrays and

reverse-transfected, resulting in the over-expression of each membrane protein and ZsGreen1. Slides were then incubated with 5  $\mu\text{g/ml}$  V5-tagged VAR2 DBL1-ID2a followed by an AlexaFluor647-labeled anti-V5 antibody (AbD Serotec). VAR2CSA-binding proteins were identified by fluorescence imaging (ZsGreen1 and AlexaFluor647) and ImageQuant software (GE). For validation and specificity testing, expression vectors encoding the VAR2CSA binding proteins were re-spotted on new slides, and HEK293 cells were reverse-transfected. Slides were then treated with V5-tagged rVAR2 with or without 400  $\mu\text{g/ml}$  CSA or following a 30 min chondroitinase ABC (CHase; Sigma) pre-treatment, or treated with rContr or with no ligand. Interactions were analysed using the AlexaFluor647-labeled anti-V5 antibody and fluorescence imaging. After fluorescence imaging of the slides, spot and background intensities were quantified from at least 6 high power field images representing at least 2 independent experiments using ImageQuant software (GE).

## **Bioinformatics**

The Bittner multicancer dataset is available at <http://www.oncomine.org/main/index.jsp> (Rhodes et al., 2004). The dataset was analyzed for median expression of identified genes encoding VAR2CSA plasma-membrane binding proteins relative to a calculated average median expression across the entire dataset. Survival and microarray analysis were performed using the R statistical environment. Affymetrix microarray datasets linked to outcome were normalized using the Robust Multichip Array (RMA) method from affy package (Gautier et al., 2004) and optimal probe sets were selected with the Jetset package (Li et al., 2011). For the Duke and the Bild lung cancer datasets, survival analysis was

performed with the overall survival time. For all the others datasets the outcome variable is the time of recurrence free survival. Survival curves were calculated using the Kaplan-Meier method. High and low expression patients were divided using the median value of the selected gene as separation point. Hazard ratio was calculated using Cox proportional hazards regression, and p value was calculated using the logrank test.

### **Immunoprecipitation**

Membrane proteins were extracted by lysing C32 cells with EBC lysis buffer (150 mM NaCl, 50 mM Tris-HCl, 2.5 mM MgCl<sub>2</sub>, 1 mM EDTA, 1% CHAPS and a protease inhibitor cocktail (Roche)). The lysate was loaded onto a Hitrap NHS HP column (GE) containing immobilized rVAR2 or DBL4 control protein. The column was washed extensively in Lyses buffer as well as lysis buffer containing 250 mM NaCl. Bound protein was eluted with 0.5 M NaCl in lysis buffer and concentrated on a vivaspin column (MWCO 10.000 kDa). Protein samples and a high-molecular weight marker (LC5699, Life Technologies) were loaded onto a NuPAGE Tris-acetate gel (Life Technologies). Proteins were subsequently transferred to a nitrocellulose overnight at 4°C at 75 mA. The membranes were stained with anti-CSPG4 antibody (LHM2, Abcam) or Anti-panCD44 (2C5, RnD systems).

### **Mass Spectrometry**

Denaturing SEC-HRMS for intact mass analysis of recombinant VAR2 and VAR2 drug conjugates was performed on a Waters Acquity H Class UPLC with PDA detection at 280 nm utilizing an Acquity UPLC BEH 200 SEC column (1.7 μM, 4.6 mm x 150 cm).

High resolution mass spectrometry detection was achieved using a MicroMass Q-TOF Premier with a scan range from 250-4900 m/z. The analysis was performed using an isocratic elution at 0.25 ml/min over 11 min with 70/30 H<sub>2</sub>O/ACN with 0.1% TFA and 0.1% FA. Data collection and analysis was done with MassLynx 4.1 with spectral deconvolution using MaxEnt1.

### **Subcutaneous PC3 and B16 tumor model**

PC-3M-Luc-C6 cells ( $2 \times 10^6$  cells) were injected subcutaneously into the right flank of Foxn1<sup>nu</sup> mice on day -12. The mice were divided into 3 groups with 10 mice in each, and were treated with intravenous injections of vehicle (saline), a control DT388 fusion protein (rContr-DT), or an rVAR2 DT388 fusion protein (rVAR2-) respectively, on day 0, 2 and 6 at 0.6 mg/Kg doses. Tumor growth was monitored using a caliper-measuring tool, and the 3 longest perpendicular axes in the x/y/z plane of each tumor were measured. Tumor volume was calculated according to the standard formula:  $\text{volume} = xy^2 \cdot 0.5236$  (Janik et al., 1975). Saline and rVAR2-DT treated mice were also injected with luciferine and scanned for tumor chemiluminescence using IVIS at day 3 and 13 after 1<sup>st</sup> dose (saline or rVAR2-DT). Control mice were given PBS or 0.33 mg/Kg rVAR2-NIR before sacrifice, and tumors were extracted and scanned by IVIS.

## **Karpas299 Xenograft Study**

The in vivo efficacy study was performed at the Experimental Therapeutics & Animal Resource Centre at the BC Cancer Research Centre. Female C.B-17/IcrHsd-Prkdcscid mice (Harlan Laboratories) were anesthetized using isoflurane and were then implanted subcutaneously in the back with  $1 \times 10^6$  Karpas299 human T cell lymphoma tumour cells per mouse. Tumours were established over a period of 19 days, and test animals were then grouped according to tumour volume such that each group (n=7) had an equal distribution of tumour volumes. Dimensions of established tumours were measured with calipers. Tumour volumes were calculated according to the equation  $(\text{Length} \times \text{Width}^2 / 2)$  with the length (millimeters) being the longer axis of the tumour. The mean tumour volume on treatment day was greater than  $150 \text{ mm}^3$ . Intravenous test article administration began on Day 21, and continued every two to three days (total of three injections) at the doses indicated in the figure legend. Animals were injected based on individual body weights using a 28 G needle. Dilation of the lateral tail vein was achieved by holding the animals under a heating lamp for 1-2 min. The animals were briefly restrained (approximately 1 min) and injection was delivered into the lateral tail vein. Animal health was assessed acutely using Post Injection Clinical Observation Record (PICOR) forms. Body weights and tumour volumes were measured every Monday, Wednesday, and Friday. Animals remained on study until their tumours reached  $800 \text{ mm}^3$  in size or they otherwise required euthanasia due to achieving a humane endpoint.

### **4T1 syngeneic bone metastasis model**

Five to 6 weeks old C57black/6 female mice were maintained under isoflurane anesthesia and ( $5 \times 10^5$ ) 4T1-luciferase cells suspended in 100  $\mu$ l of PBS solution were injected into the left ventricle under ultrasound guidance using a 30 gauge needle. The location of the tip of the needle in the left ventricle was confirmed by pulsatile blood flow in the hub of the needle. Animals were monitored until 8 weeks after injection using IVIS imaging system. Metastasis sites were collected at day of sacrifice and fixed in formalin for pathology studies.

### **Preparation of Drug Conjugate**

To a solution of DBL1-ID2a (25.7 mg; 225 nmol) in ice cold PBS, pH 7.4 (34 ml) was added MTvc-KT886 (180  $\mu$ l of a 10 mM dmso stock solution). The protein solution was mixed gently and allowed to stand on ice for a period of 70 min prior to concentration to a final volume of 12 ml by passage over an Amicon Ultra Centrifugal Filter (3000 xg; ~25 mins; 4°C; 50 kDa MWCO; Millipore product UFC905096). The concentrated protein solution was next purified over Zeba Spin Desalting Columns (40 kDa MWCO; 10 ml size; Thermo Scientific product 87772) preconditioned with sterile PBS. Concentration of the recovered materials was estimated by BCA assay using DBL1-ID2a as a standard. Composition and purity of the VDC were assessed by SDS-PAGE and SEC-UPLC-Esi-MS.

## **In vitro Cytotoxicity Assay of VAR2-Drug Conjugates using human Cancer Cell lines**

Cells were removed from their culture vessel using Gibco® Trypsin-EDTA (Invitrogen # 25300-054). Detached cells were diluted in respective growth medium (Invitrogen #: 10313-021, A10491-01, 16600-082, 12561-056, 35050-061, 11415-064) + 10% Fetal bovine serum (Corning #: 35-015-CV) to 25000 cells/mL such that 100 µl/well will dispense 2500 cells/well. Cells were seeded into black walled, flat bottomed 96-well plates (Costar # 3904). Adherent cell lines cells were incubated for one night at 37 °C in a 5% CO<sub>2</sub> atmosphere (No CO<sub>2</sub> for MDA-MB-231) to allow the cells to attach to the microtitre plate surface, while suspension cells were seeded immediately before use. Test compounds were diluted directly in the appropriate cell growth medium at five-times the desired final concentration. These compounds were then titrated 1:3, over eight steps. A control with no test compound present (growth medium alone) was included on each microtiter plate in sextuplicate. 25 µl/well of the prepared titrations was added in triplicate to each cell line assayed. The cells and titrations were incubated at 37 °C / 5% CO<sub>2</sub> for five nights. After the incubation, cell viability was measured using CellTiter-Glo® (Promega #G7572) reagent by adding thirty µl of prepared CellTiter-Glo® to each assay well. The mixtures were incubated for at least twenty min in the dark prior to measuring emitted luminescence using a microplate luminometer (500 ms integration time). The collected relative luminescence units (RLU) were converted to % cytotoxicity using the RLU values measured from the growth medium alone control as follows: % Cytotoxicity = 1 - [Well RLU/average medium alone control RLU]. Data (% Cytotoxicity vs. Concentration of

ADC (log<sub>10</sub> [nM]) were plotted and were analyzed by non-linear regression methods using GraphPad Prism software v. 5.02 to obtain EC<sub>50</sub> estimates.

### ***In vitro* toxicity assay using DT-VAR2**

The cells were seeded and incubated 3-5 days with toxin coupled rVAR2 or control protein. 400 µg/ml CSA was used as a specificity control. Following incubation, cells were washed in PBS and stained with Methylene Blue in Methanol or WST1 (Roche). Color was dissolved in 0.2 M Sodium Citrate in 50% Ethanol and quantified by absorbance at 450 nm. IC<sub>50</sub> values were calculated as concentration of toxin at 50% survival. For a description of the *in vitro* tox assay using VCD886 please see supplementary methods.

### **Tolerability Study**

Female CD-1 mice (Harlan Laboratories) were injected with the test articles and doses indicated in the figure legend using the housing/restraint/injection methods indicated above. Monitoring for acute toxicity effects was facilitated using the Post Injection Clinical Observation Record (PICOR) to assess morbidity and help determine humane endpoints. A PICOR was only completed for an animal in the event that a moribund animal was observed. Mice were monitored and weighed 3 times weekly for 12 days. Dose escalation occurred following favourable assessment of acute tolerability.



## SUPPLEMENTAL REFERENCES

- Della Peruta, M., Martinelli, G., Moratti, E., Pintani, D., Vezzalini, M., Mafficini, A., Grafone, T., Iacobucci, I., Soverini, S., Murineddu, M., et al. (2010). Protein tyrosine phosphatase receptor type {gamma} is a functional tumor suppressor gene specifically downregulated in chronic myeloid leukemia. *Cancer research* 70, 8896-8906.
- Gautier, L., Cope, L., Bolstad, B.M., and Irizarry, R.A. (2004). affy--analysis of Affymetrix GeneChip data at the probe level. *Bioinformatics* 20, 307-315.
- Hanly, A.M., Hayanga, A., Winter, D.C., and Bouchier-Hayes, D.J. (2005). Thrombomodulin: tumour biology and prognostic implications. *Eur J Surg Oncol* 31, 217-220.
- Iozzo, R.V., and Sanderson, R.D. (2011). Proteoglycans in cancer biology, tumour microenvironment and angiogenesis. *J Cell Mol Med* 15, 1013-1031.
- Janik, P., Briand, P., and Hartmann, N.R. (1975). The effect of estrone-progesterone treatment on cell proliferation kinetics of hormone-dependent GR mouse mammary tumors. *Cancer Res* 35, 3698-3704.
- Kai, H., Kadono, T., Kakinuma, T., Tomita, M., Ohmatsu, H., Asano, Y., Tada, Y., Sugaya, M., and Sato, S. (2011). CCR10 and CCL27 are overexpressed in cutaneous squamous cell carcinoma. *Pathol Res Pract* 207, 43-48.
- Larsson, A., Johansson, M.E., Wangefjord, S., Gaber, A., Nodin, B., Kucharzewska, P., Welinder, C., Belting, M., Eberhard, J., Johnsson, A., et al. (2011). Overexpression of podocalyxin-like protein is an independent factor of poor prognosis in colorectal cancer. *Br J Cancer* 105, 666-672.
- Li, Q., Birkbak, N.J., Gyorffy, B., Szallasi, Z., and Eklund, A.C. (2011). Jetset: selecting the optimal microarray probe set to represent a gene. *BMC Bioinformatics* 12, 474.
- Murakami, T., Cardones, A.R., and Hwang, S.T. (2004). Chemokine receptors and melanoma metastasis. *J Dermatol Sci* 36, 71-78.
- Mythreye, K., and Blobel, G.C. (2009). Proteoglycan signaling co-receptors: roles in cell adhesion, migration and invasion. *Cell Signal* 21, 1548-1558.
- Naor, D., Sionov, R.V., and Ish-Shalom, D. (1997). CD44: structure, function, and association with the malignant process. *Adv Cancer Res* 71, 241-319.

Pacheco, M., and Nielsen, T.O. (2012). Histone deacetylase 1 and 2 in mesenchymal tumors. *Mod Pathol* 25, 222-230.

Takacova, M., Bartosova, M., Skvarkova, L., Zatovicova, M., Vidlickova, I., Csaderova, L., Barathova, M., Breza, J., Jr., Bujdak, P., Pastorek, J., et al. (2013). Carbonic anhydrase IX is a clinically significant tissue and serum biomarker associated with renal cell carcinoma. *Oncol Lett* 5, 191-197.

Theocharis, A.D., Skandalis, S.S., Tzanakakis, G.N., and Karamanos, N.K. (2010). Proteoglycans in health and disease: novel roles for proteoglycans in malignancy and their pharmacological targeting. *FEBS J* 277, 3904-3923.

Uchida, T., Wada, K., Akamatsu, T., Yonezawa, M., Noguchi, H., Mizoguchi, A., Kasuga, M., and Sakamoto, C. (1999). A novel epidermal growth factor-like molecule containing two follistatin modules stimulates tyrosine phosphorylation of erbB-4 in MKN28 gastric cancer cells. *Biochem Biophys Res Commun* 266, 593-602.

Williamson, D., Selfe, J., Gordon, T., Lu, Y.J., Pritchard-Jones, K., Murai, K., Jones, P., Workman, P., and Shipley, J. (2007). Role for amplification and expression of glypican-5 in rhabdomyosarcoma. *Cancer research* 67, 57-65.

Wu, R., Duan, L., Ye, L., Wang, H., Yang, X., Zhang, Y., Chen, X., Weng, Y., Luo, J., Tang, M., et al. (2013). S100A9 promotes the proliferation and invasion of HepG2 hepatocellular carcinoma cells via the activation of the MAPK signaling pathway. *Int J Oncol* 42, 1001-1010.

Zhao, X.Y., Liu, H.L., Liu, B., Willuda, J., Siemeister, G., Mahmoudi, M., and Dinter, H. (2008). Tomoregulin internalization confers selective cytotoxicity of immunotoxins on prostate cancer cells. *Transl Oncol* 1, 102-109.
